# Supplementary material for: C9orf72-G4C2 Intermediate Repeats and Parkinson’s Disease; A Data-Driven Hypothesis
Source: MDPI journal article supplement (doi:10.3390/genes12081210), 2021-08-05

**Figure S1.** Number of alleles observed for each *C9orf72*-G<sub>4</sub>C<sub>2</sub>-repeat-size with risk or non-risk haplotypes in the Ashkenazi Jews (PDs and controls).

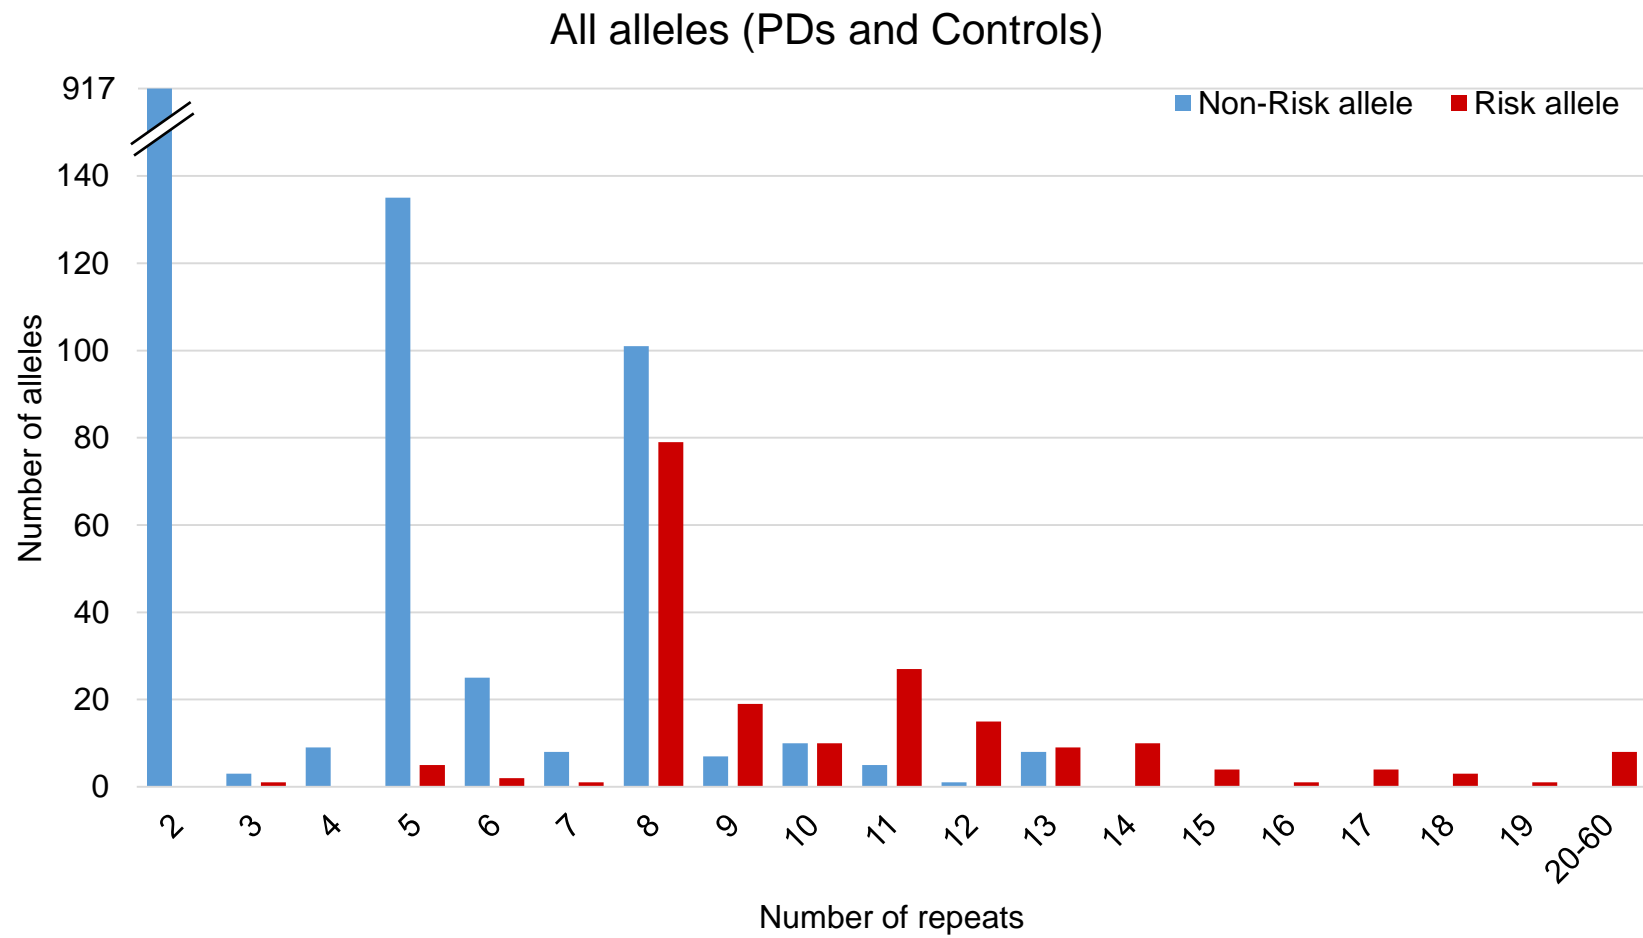

Supplement: s1 [file s1]
