# Supplementary material for: C9orf72-G4C2 Intermediate Repeats and Parkinson’s Disease; A Data-Driven Hypothesis
Source: MDPI journal article supplement (doi:10.3390/genes12081210), 2021-08-05
Supplement: s1 [file s1]

**Table S1.** Allele frequencies of G<sub>4</sub>C<sub>2</sub> hexanucleotide repeat lengths in *C9orf72* in Parkinson's disease patients of Ashkenazi Jewish origin and controls.

| Number of repeats | PD patients               |                       | Control <sup>c</sup> |
|-------------------|---------------------------|-----------------------|----------------------|
|                   | Non-carriers <sup>a</sup> | Carriers <sup>b</sup> |                      |
|                   | Frequency percent         |                       |                      |
| 2                 | 63.1                      | 66.2                  | 66.4                 |
| 3                 | 0.3                       | 0.1                   | 0.6                  |
| 4                 | 0.4                       | 1.2                   | 0.3                  |
| 5                 | 9.7                       | 8.9                   | 10.2                 |
| 6                 | 2.5                       | 1.7                   | 2.0                  |
| 7                 | 0.8                       | 0.4                   | 0.8                  |
| 8                 | 12.7                      | 12.1                  | 11.0                 |
| 9                 | 1.8                       | 1.4                   | 1.5                  |
| 10                | 1.6                       | 1.2                   | 1.5                  |
| 11                | 2.0                       | 2.4                   | 2.4                  |
| 12                | 1.0                       | 1.2                   | 1.0                  |
| 13                | 1.5                       | 1.2                   | 0.9                  |
| 14                | 0.7                       | 0.9                   | 0.3                  |
| 15                | 0.1                       | 0.0                   | 0.1                  |
| 16                | 0.1                       | 0.0                   | 0.3                  |
| 17                | 0.2                       | 0.5                   | 0.3                  |
| 18                | 0.2                       | 0.0                   | 0.1                  |
| 19                | 0.0                       | 0.1                   | 0.2                  |
| 20                | 0.2                       | 0.0                   | 0.0                  |
| 21                | 0.2                       | 0.3                   | 0.0                  |
| 22                | 0.1                       | 0.0                   | 0.1                  |
| 23                | 0.1                       | 0.0                   | 0.1                  |
| 24                | 0.1                       | 0.0                   | 0.0                  |
| 27                | 0.0                       | 0.0                   | 0.0                  |
| 28                | 0.0                       | 0.1                   | 0.0                  |
| 29                | 0.1                       | 0.0                   | 0.0                  |
| 32                | 0.1                       | 0.0                   | 0.0                  |
| 50                | 0.0                       | 0.0                   | 0.1                  |
| 58                | 0.1                       | 0.0                   | 0.0                  |
| >145              | 0.3                       | 0.1                   | 0.1                  |
| Total             | 100.0                     | 100.0                 | 100.0                |

<sup>a</sup> Patients without the *LRRK2*, *GBA* or *SMPD1* mutations.

<sup>b</sup> Carriers of one or more of the following mutations: *LRRK2* p.G2019S; *GBA* mutations: c.84insG, IVS2+1G>A, p.V394L, p.N370S, p.L444P, p.R496H, p.E326K, p.T369M, p.R44C and Rec370; *SMPD1* p.L302P.

<sup>c</sup> The cohort of controls has been recently published [26].
